# Supplementary material for: Stabilization of E-cadherin adhesions by COX-2/GSK3β signaling is a targetable pathway in metastatic breast cancer
Source: PubMed Central journal article supplement (PMC10070121; doi:10.1172/jci.insight.156057), 2023-03-22
Supplement: jciinsight-8-156057-s208.pdf [file jciinsight-8-156057-s208.pdf]

## SUPPLEMENTAL INFORMATION

### **Stabilization of E-cadherin adhesions by COX-2/GSK3 $\beta$ signaling is a targetable pathway in metastatic breast cancer**

Kuppusamy Balamurugan<sup>1\*</sup>, Dipak K. Poria<sup>1</sup>, Saadiya W. Seharen<sup>1</sup>, Savitri Krishnamurthy<sup>2</sup>, Wei Tang<sup>3</sup>, Lois McKennett<sup>4</sup>, Veena Padmanaban<sup>5,6</sup>, Kelli Czarra<sup>4</sup>, Andrew J. Ewald<sup>5</sup>, Naoto T. Ueno<sup>2</sup>, Stefan Ambs<sup>3</sup>, Shikha Sharan<sup>1</sup>, and Esta Sterneck<sup>1\*</sup>

<sup>1</sup> Laboratory of Cell and Developmental Signaling, Center for Cancer Research (CCR), National Cancer Institute (NCI), Frederick, MD, USA

<sup>2</sup> Morgan Welch Inflammatory Breast Cancer Research Program and Clinic, The University of Texas MD Anderson Cancer Center, Houston, TX, USA

<sup>3</sup> Laboratory of Human Carcinogenesis, CCR, NCI, Bethesda, MD, USA

<sup>4</sup> Laboratory Animal Sciences Program, Leidos Biomedical Research Inc., Frederick National Laboratory for Cancer Research, Frederick, MD, USA

<sup>5</sup> Departments of Cell Biology and Oncology, Sidney Kimmel Comprehensive Cancer Center, Johns Hopkins University School of Medicine, Baltimore, MD, USA

<sup>6</sup> Present Address: Laboratory of Systems Cancer Biology, The Rockefeller University, New York, NY, USA

\*Corresponding authors:

Esta Sterneck, [sternecg@mail.nih.gov](mailto:sternecg@mail.nih.gov), tel.301-846-1471

Kuppusamy Balamurugan, [kuppusamyb@mail.nih.gov](mailto:kuppusamyb@mail.nih.gov), tel.301-846-5257

National Cancer Institute, 1050 Boyles Street, Frederick, MD 21702-120, USA

#### **CONTENT:**

- **Supplemental Tables S1**
- **Supplemental Figures S1-S6**

**Supplemental Table S1. Primers used for qPCR analysis**

| <b>GENE</b>   | <b>FORWARD</b>               | <b>REVERSE</b>                |
|---------------|------------------------------|-------------------------------|
| <i>CDHI</i>   | 5'-AGCAGA ACTAACACACGGGG-3'  | 5'-ATACCGGGGGACACTCATGA-3'    |
| <i>CDKN1A</i> | 5'-ACCATGTGGACCTGTCACTGT-3'  | 5'-TTAGGGCTTCCTCTTGGAGAA-3'   |
| <i>CEBPD</i>  | 5'-GCCATGTACGACGACGAGA-3'    | 5'-TTGCTGTTGAAGAGGTCGG-3'     |
| <i>CTNNA1</i> | 5'-GGCAGCCAAAAGACAACAGG-3'   | 5'-TTACGTCCAGCATTGCCCAT-3'    |
| <i>CTNNB1</i> | 5'-TTGAAGGTTGTACCGGAGCC-3'   | 5'-GCCACCCATCTCATGTTCCA-3'    |
| <i>CTNND1</i> | 5'-TTGAGTGGGAATCGGTGCTC-3'   | 5'-AGGAGGTCAGCTATGGCAGA-3'    |
| <i>GAPDH</i>  | 5'-AAGGTCGGAGTCAACGGATTTG-3' | 5'-CCATGGGTGGAATCATATTGGAA-3' |
| <i>IL6</i>    | 5'-ACAAATTCGGTACATCCTC-3'    | 5'-GCAGAATGAGATGAGTTGT-3'     |
| <i>PTGS2</i>  | 5'-GCTGTGGGGCAGGAAGTC-3'     | 5'-TTGGAATAGTTGCTCATCACC-3'   |
| <i>RPLP0</i>  | 5'-GCAATGTTGCCAGTGTCTGTC-3'  | 5'-GCCTTGACCTTTTCAGCAAGT-3'   |

## Supplemental Figure S1

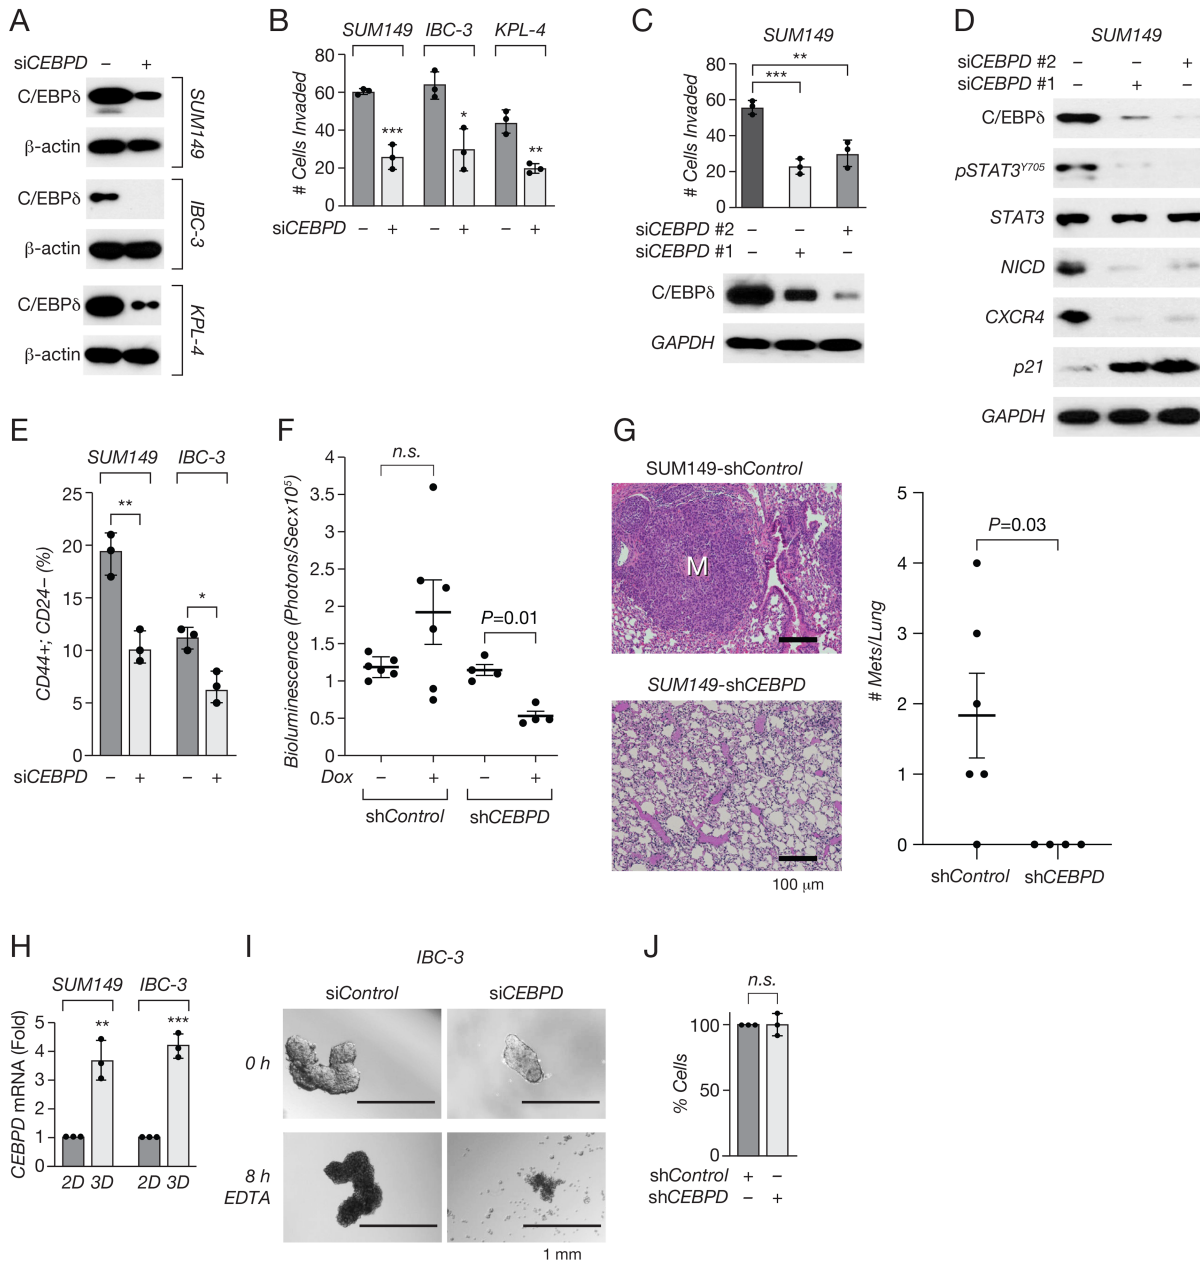

**Supplemental Figure S1. C/EBPδ promotes malignant phenotypes in IBC cells.** (A) Western analysis of C/EBPδ expression in SUM149, IBC-3 and KPL-4 cells 72 h after transfection with siControl (-) or siCEBPD oligos (+). (B) Quantification of the number of cells invaded through transwell Matrigel by SUM149, IBC-3 and KPL-4 cells transfected with siControl (-) or siCEBPD (+) oligos (n=3, mean±SEM; \*P<0.05, \*\*P<0.01, \*\*\*P<0.001 compared to siControl). (C) Quantification of the number of cells invaded through transwell Matrigel by SUM149 cells transfected with siControl (-) or two independent siCEBPD (+) oligos (n=3, mean ±SEM, \*\*P<0.01\*\*\*P<0.001 compared to siControl). Western analysis of C/EBPδ expression is shown below. (D) Western analysis of the indicated proteins from SUM149 cells transfected with control (-) or two independent siCEBPD (+) oligos. (E) Flow cytometric quantification of cells with CD44<sup>+</sup>:CD24<sup>-</sup> cell surface markers among SUM149 and IBC-3 cells transfected with control (-) or siCEBPD (+) oligos followed by culture in 2D for 3 days (n=3; mean ±SEM, \*P <0.05, \*\*P<0.01). (F) Quantification of bioluminescence (total Flux) in the lungs of mice with experimental metastases from SUM149 cells with doxycycline (Dox)-inducible shRNAs before (-) and 4 weeks after (+) treatment with Dox (n=4 and 6, \*\*P<0.01 by two-sided paired t-test; n.s., not significant). (G) Light microscope images (left) of Hematoxylin and Eosin stained sections of lungs from mice as in panel F (M, metastasis) and quantification (right) of the number of tumor cell colonies, Mets (n=4 and 6, P=0.03 by unpaired two-sided Wilcoxon test). (H) qPCR analysis of CEBPD mRNA in SUM149 and IBC-3 cell lines that were cultured on plastic (2D) or as emboli (3D) for 4 days as in Figure 1C (n=3, mean ±SEM, \*\*P<0.01, \*\*\*P<0.001 compared to 2D). (I) Images of representative emboli from IBC-3 cells that had been transfected with control or siCEBPD oligos taken before and after treatment of the same embolus with EDTA for 8 h. (J) Quantification of the number of cells in 3 day-old emboli as in Figure 1I before treatment (n=3; n.s., not significant).

## Supplemental Figure S2

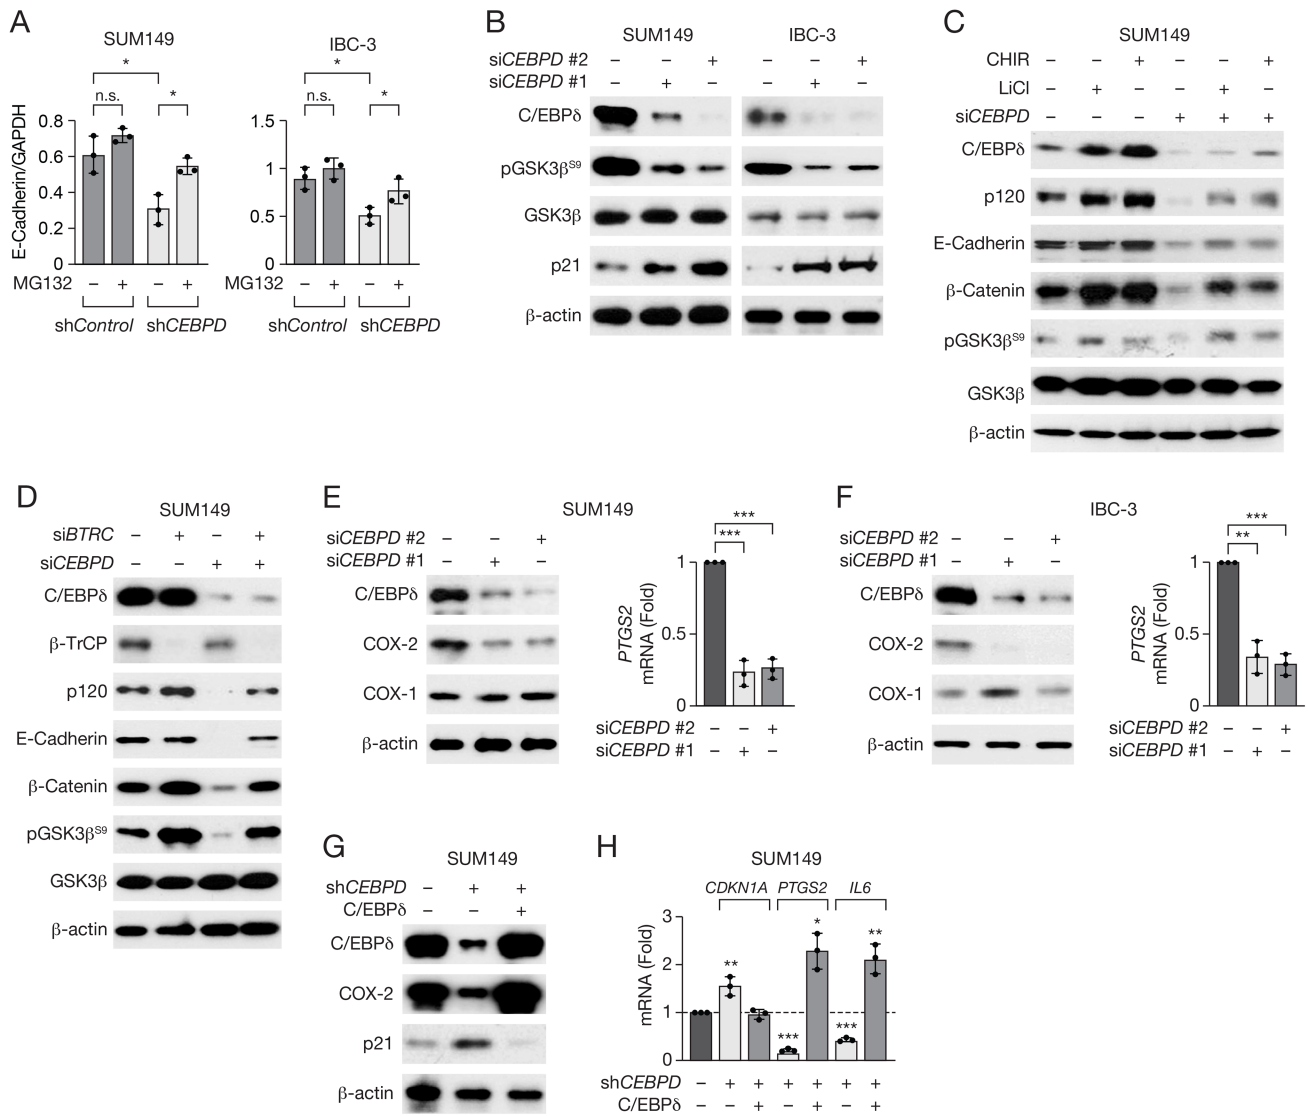

**Supplemental Figure S2. C/EBPδ promotes E-cadherin protein stability through GSK3β inhibition and COX-2 gene transcription.** (A) Quantification of E-Cadherin protein signal from Western analyses as in Figure 2A normalized to GAPDH loading control (n=3, mean ± SEM, \*P<0.05; n.s., not significant). (B) Western analysis of the indicated proteins in emboli from SUM149 and IBC-3 cells that were transfected with control or two independent siCEBPD oligos. (C) Western analysis of the indicated proteins in emboli from SUM149 cells transfected with control (-) or siCEBPD oligos and treated with LiCl (10 mM) or CHIR (5 μM) for 6 h. (D) Western analysis of the indicated proteins in emboli from SUM149 cells transfected with control (-) or siCEBPD along with siBTRC (β-TrCP) oligos. (E-F) Western (left) and mRNA analyses by qPCR (right) of COX-2 (PTGS2) expression in (E) SUM149 and (F) IBC-3 cells 72 h after transfection with siControl or two independent siCEBPD oligos (n=3, mean±SEM, \*\*P<0.01, \*\*\*P<0.001 compared to siControl). (G) Western analysis of the indicated proteins in SUM149 cells with stable expression of shControl (-) or shCEBPD (+) shRNA 72 h after transfection with vector (-) or C/EBPδ expression plasmid (+). (H) qPCR analysis of the indicated mRNA's in cells as in panel G (n=3, mean±SEM; \*P<0.05, \*\*P<0.01, \*\*\*P<0.001 compared to transfected with empty vectors).



# Supplemental Figure S3

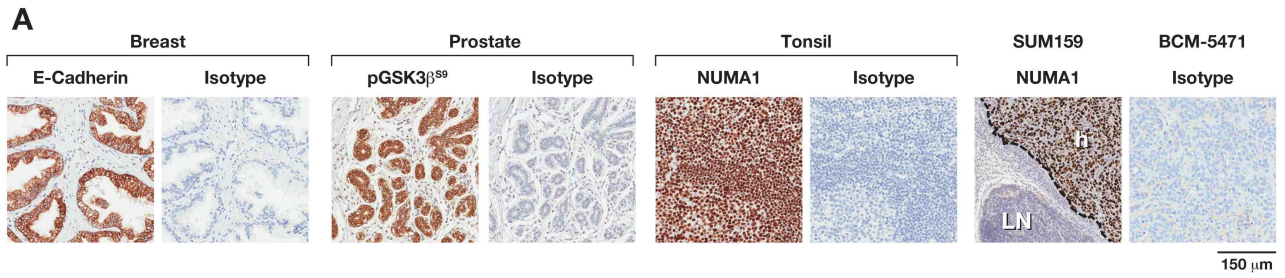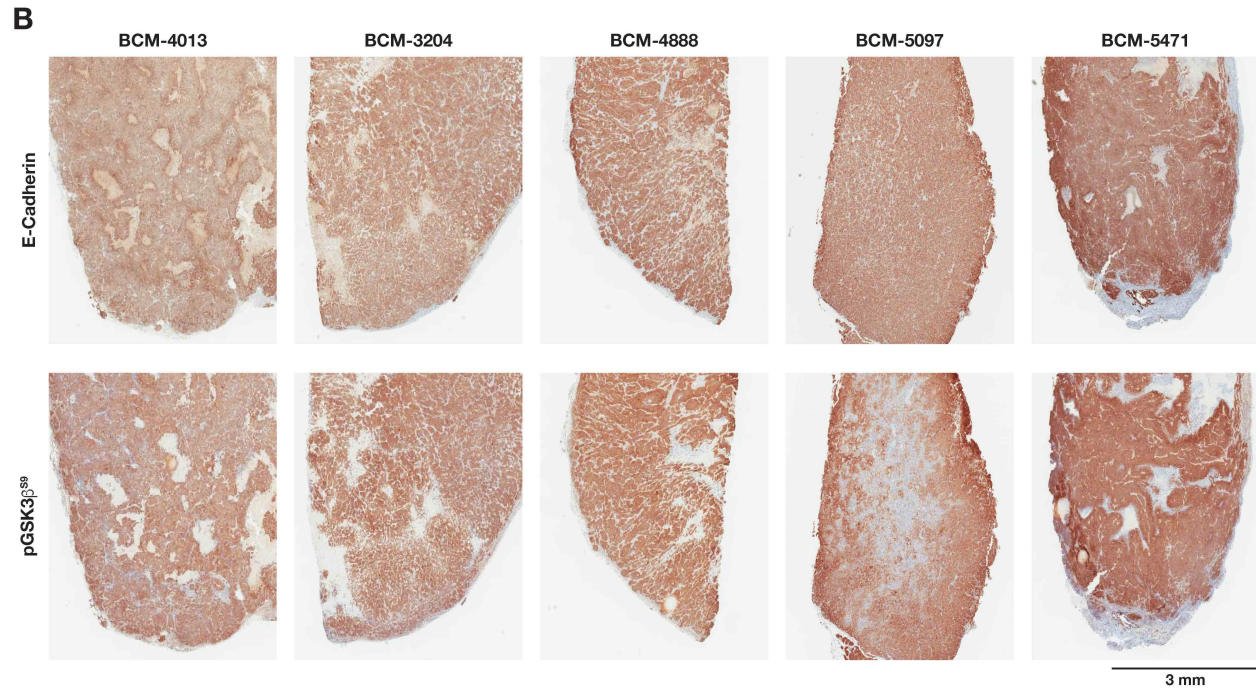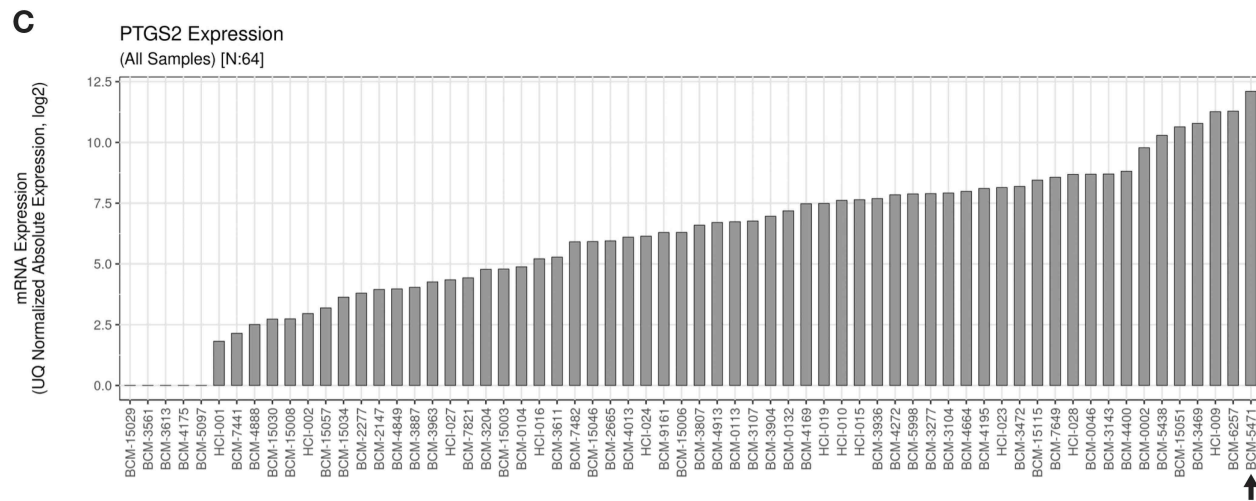

## Supplemental Figure S3 continued

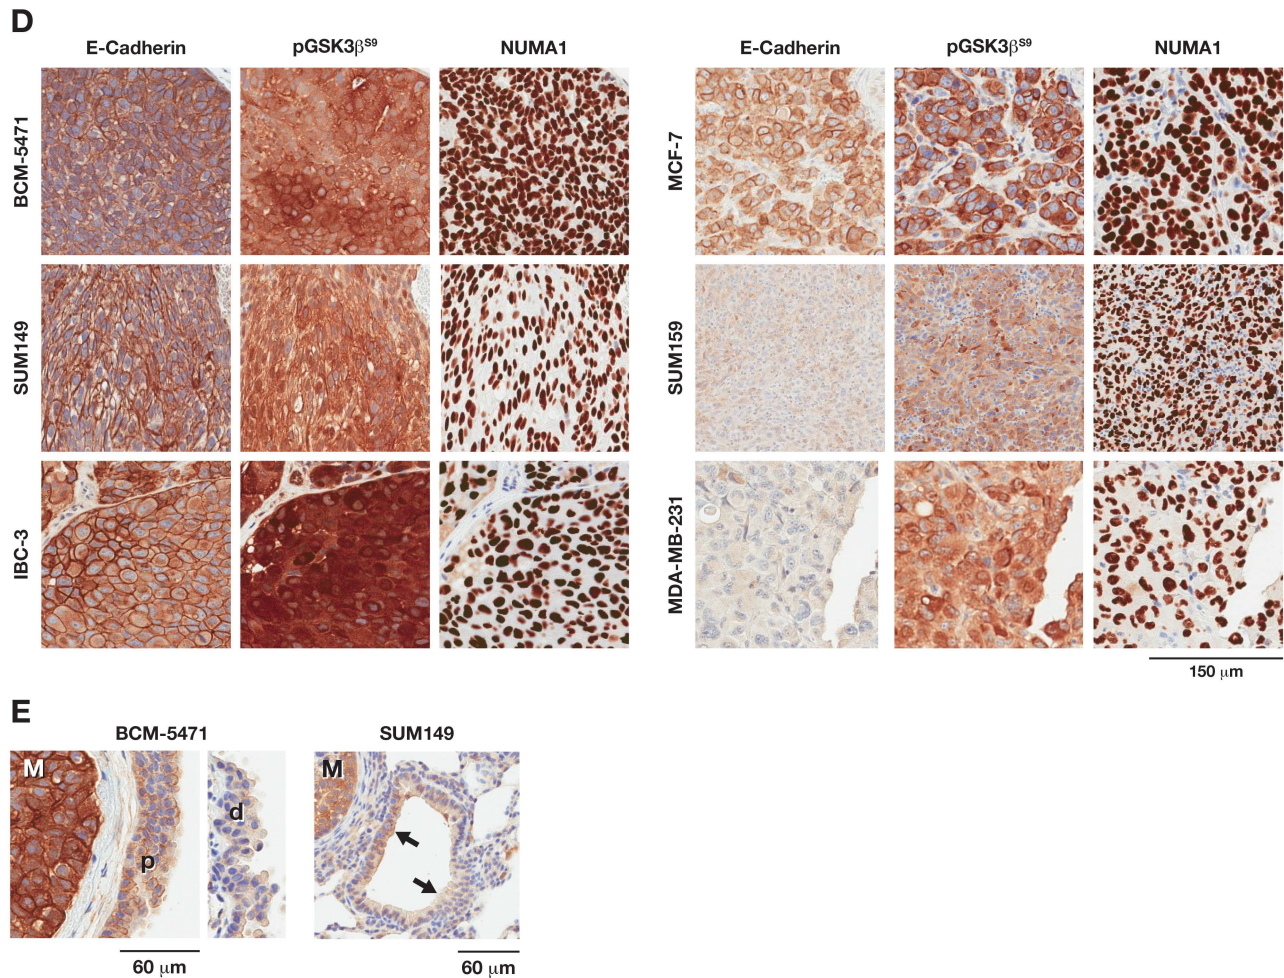

**Supplemental Figure S3. Expression analysis of breast cancer xenograft primary tumors and lung metastases.** (A) Antibody control samples showing immunostaining of E-Cadherin, pGSK3 $\beta^{S9}$  and human-specific NUMA1 on serial sections of normal human tissues as indicated and the respective isotype controls. NUMA1 staining of a SUM159 xenograft tumor denotes its specificity to human cells (h) while mouse stroma with lymph node (LN), demarcated by the dotted line, does not stain. A representative image of BCM-5471 tumor tissue shows lack of staining with isotype control antibodies. (B) Immunostaining of E-Cadherin and pGSK3 $\beta^{S9}$  on serial sections of primary tumors from the indicated PDX models, representing TNBC (BCM-3204, -4013, 5471), ER+/HER2+ (BCM-4888), and ER+ (BCM-5097) subtypes. (C) *PTGS2* mRNA data of BC PDX models as reported by the Patient-Derived Xenograft and Advanced In Vivo Models (PDX-AIM) Core at Baylor College of Medicine (<https://pdxportal.research.bcm.edu>). (D) Immunostaining of E-Cadherin, pGSK3 $\beta^{S9}$  and NUMA1 on primary tumor sections of PDX BCM-5471 and the indicated cell lines. (E) BCM-5471 and SUM149 lung metastases (M) with immunostaining of pGSK3 $\beta^{S9}$  (p/d, proximal/distal; black arrows indicate bronchial epithelium).



## Supplemental Figure S4

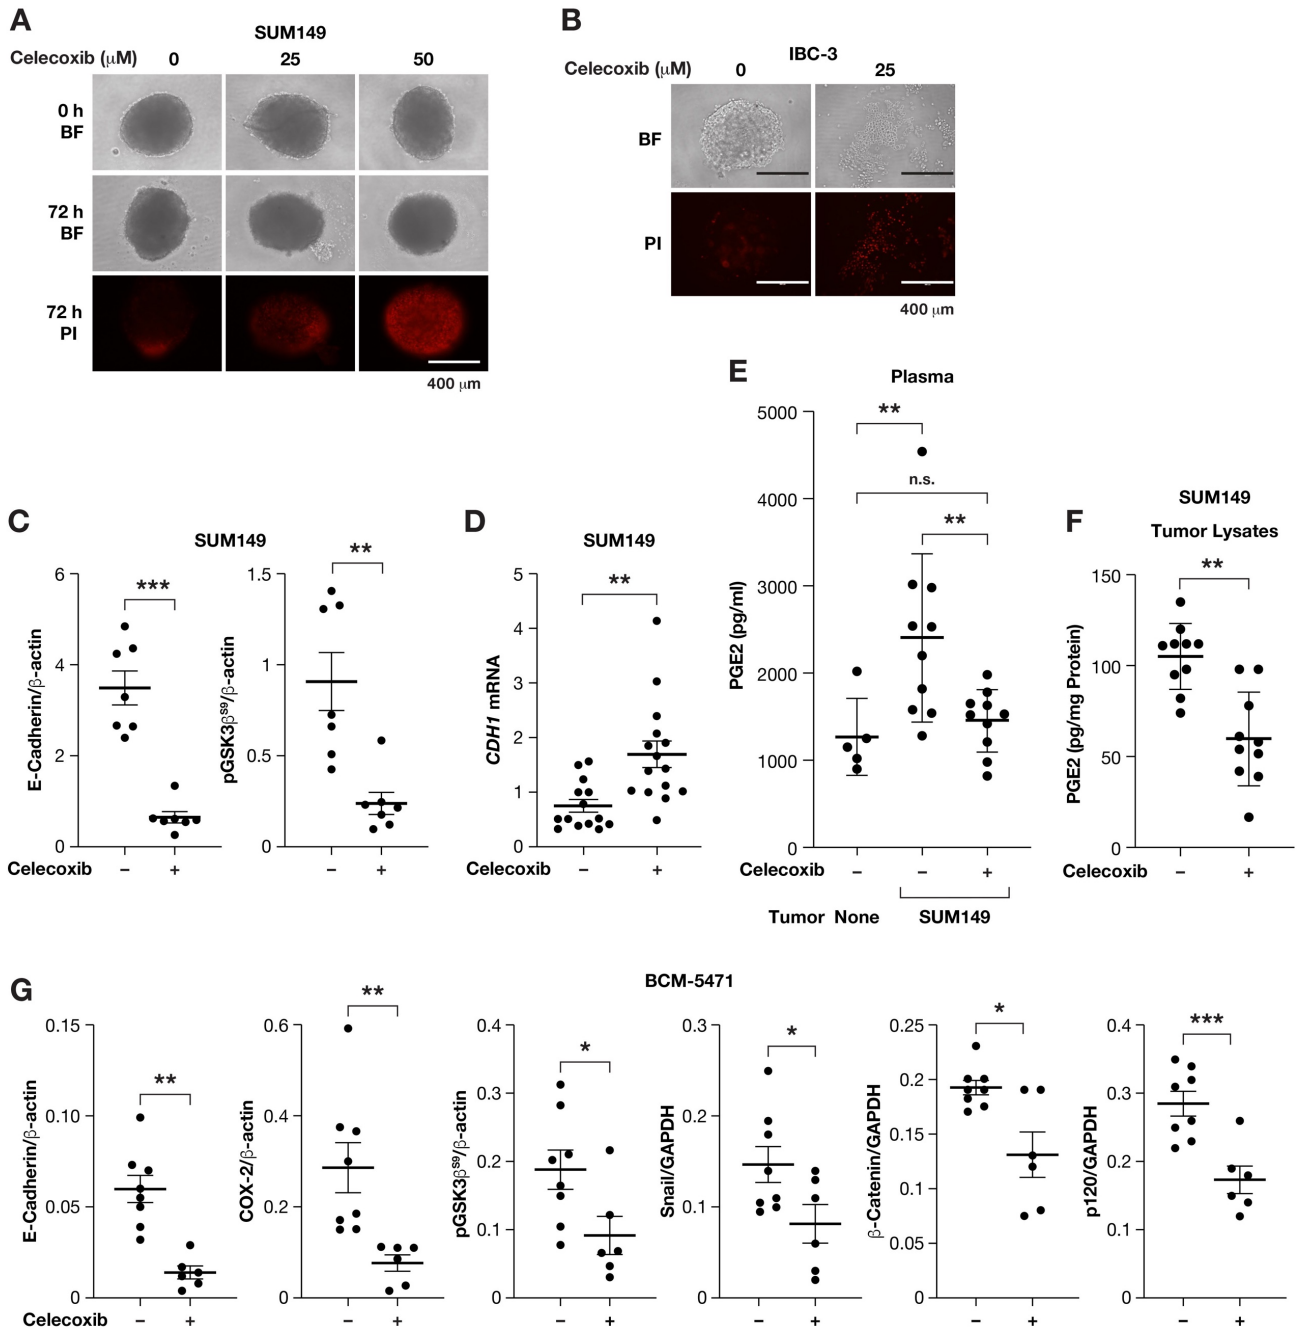

**Supplemental Figure S4. Effect of celecoxib on established emboli in vitro and tumors in vivo.** (A) Images of representative SUM149 cell emboli after 3 days of culture (0 h) and following another 72 h of treatment with celecoxib, as indicated, and stained with propidium iodide (PI, fluorescence imaging; BF, bright field). (B) Representative images of IBC-3 cells cultured in 3D  $\pm$  celecoxib for 72 h and stained with PI (BF, bright field). (C) Quantification of E-Cadherin and pGSK3 $\beta^{\text{S9}}$  signals shown in Figure 4F of SUM149 tumors treated  $\pm$  Celecoxib ( $n=7$ , mean $\pm$ SEM;  $**P<0.01$ ,  $***P<0.001$  by unpaired two-sided Wilcoxon rank-sum test). (D) Quantification by qPCR analysis of *CDH1* mRNA in SUM149 tumors as in Figure 4F ( $n=14-15$ ,  $**P<0.01$  by unpaired Wilcoxon rank-sum test). (E) Concentration of PGE2 in plasma of mice bearing SUM149 tumors as shown in Figure 4F ( $n=10$ ). Tumor-free mice ( $n=5$ ) were used as control (mean $\pm$ SEM; n.s., not significant,  $P$  values by unpaired two-sided Wilcoxon rank-sum test). (F) Quantification of PGE2 in SUM149 tumor tissue extracts from mice as in Figure 4F ( $n=10$ , mean $\pm$ SEM; n.s., not significant;  $**P<0.01$  by unpaired two-sided Wilcoxon rank-sum test). (G) Quantification of Western analysis shown in Figure 4I of BCM-5471 PDX tumors treated  $\pm$  Celecoxib ( $n=6-8$ , mean $\pm$ SEM;  $*P<0.05$ ,  $**P<0.01$ ,  $***P<0.001$  by unpaired two-sided Wilcoxon rank-sum test).

## Supplemental Figure S5

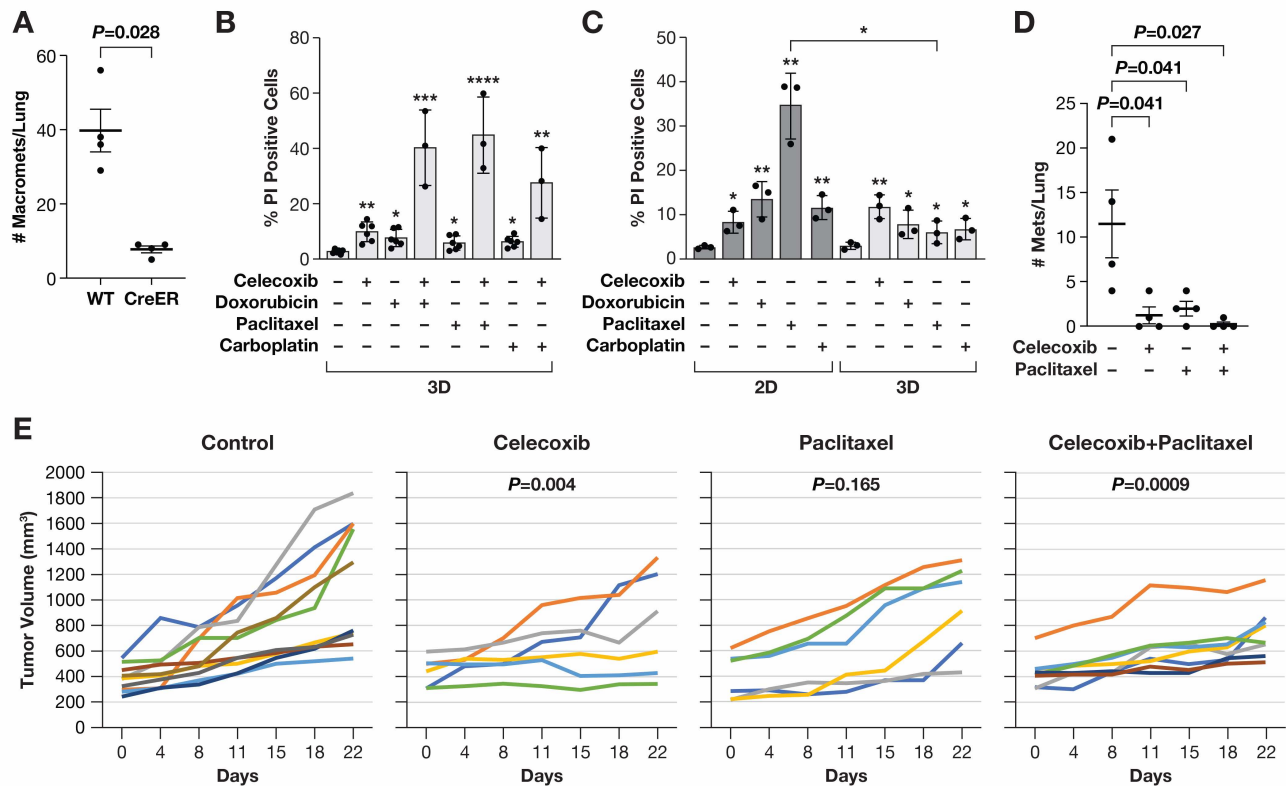

**Supplemental Figure S5. Effect of *Cdh1* deletion in seeded metastases and assessment of celecoxib and paclitaxel drug sensitivity in vitro and in vivo.** (A) Quantification of macrometastases in lungs of mice injected with E-cadfl/fl or E-cadfl/fl; CreER expressing cells, followed 1 week later by tamoxifen injection to delete the E-cadherin gene, and harvested 3 weeks thereafter ( $n=4$ ,  $P$  value by two-tailed non-parametric t-test, Mann Whitney). (B) Quantification of propidium iodide (PI) positive cells in emboli treated after 3 days of 3D culture for additional 3 days with individual drugs ( $50 \mu\text{M}$  celecoxib,  $500 \text{ nM}$  doxorubicin,  $50 \text{ nM}$  paclitaxel,  $10 \mu\text{M}$  carboplatin) and/or combinations as indicated ( $n=3$ , mean $\pm$ S.E.M.; \* $P<0.05$ , \*\* $P<0.01$ , \*\*\* $P<0.001$ , \*\*\*\* $P<0.0001$  compared to DMSO control). (C) Quantification of PI positive cells from cells cultured in 2D or 3D and treated as in panel B ( $n=3$ , mean $\pm$ S.E.M.; \* $P<0.05$ , \*\* $P<0.01$  compared to DMSO control or as indicated by bracket). (D) Quantification of tumor cell colonies (mets) in lungs of mice injected with SUM149 cells and treated with celecoxib ( $1000 \text{ mg/kg}$  chow) and/or paclitaxel ( $10 \text{ mg/kg}$  i.v.),  $n=4$ ,  $P$  as indicated by two-sided unpaired Wilcoxon test compared to untreated. (E) Tumor volume measurements of BCM-5471 PDX's in mice treated with celecoxib ( $1000 \text{ mg/kg}$  chow) and/or paclitaxel ( $10 \text{ mg/kg}$  i.v.),  $n=6-10$ ,  $P$  values were determined by a linear model of treatment by day interaction relative to control baseline.

## Supplemental Figure S6

### NM\_005195.3 CEBPD mRNA

```

AGGTGACAGCCTCGCTTGGACGCAGAGCCCGGCCGACGCCGCCATCAGCGCCGCGCTCTTCAGCCTGGA 70
CGGCCCGGCGCGCGCGCCCTGGCCTGCGGAGCCTGCGCCCTTCTACGAACCGGGCCGGGCGGGCAAG 140
CCGGGCCCGGGGCGGAGCCAGGGCCCTAGGCGAGCCAGGGCCGCGCCCGCCATGTACGACGACG 210
AGAGCGCCATCGACTTCAGCGCCTACATCGACTCCTATGGCCGCGGTGCCACCCCTGGAGCTGTGCCACGA 280
CGAGCTCTTCGCGGACCTCTTCAACAGCAATCACAAGGCGGGCGGCGGGGCCCTGGAGCTTCTTCC 350
TCGCGGACCTCTTCAACAG=siRNA#1

GGGGCCCCGCGCGCCCTTGGGCCGGGCCCTGCGCTCCCGCCTGCTCAAGCGGAGCCCGACTGGG 420
GCGACGGCGACGCGCCCGCTCGCTGTTGCCGCGCAGGTGGCCGCGTGCACACAGACCGTGGTGAGCTT 490
GGCGGCCGAGGGCAGCCACCCCGCCACGTCGCCGGAGCCGCGCGCAGCAGCCCAAGGCAGACCCCC 560
GCGCCCGGCCCGCCGGGAGAAGAGCGCCGGAAGAGGGGCCGGACCGCGGAGCCCGGAGTACCGGC 630
AGCGGCGGAGCGCAACAACATCGCCGTGCGCAAGAGCCGCGACAAGGCCAAGCGGCGCAACCAGGAGAT 700
pDEST_SIGMA=AACCAGGAGAT

GCAGCAGAAGTTGGTGAGCTGTGCGCTGAGAACGAGAAGCTGCACCAGCGGTGGAGCAGCTCACGCGG 770
GCAGCAGAAGT
GACCTGGCCGGCCTCCGGCAGTTCTTCAAGCAGCTGCCAGCCCGCCCTTCTGCGGCCGCGGGGACAG 840
CAGACTGCCGGTAAAGCGCGCGCCGGGGCGGAGAGACTCAGCAACGACCCATACCTCAGACCCGACGGCC 910
CGGAGCGGAGCGCCCTGCCCTGGCGCAGCCAGAGCCCGGGTGCCCGCTGCAGTTTCTTGGGACATA 980
GGAGCGCAAAGAAGCTACAGCCTGGACTTACCACCACTAAACTGCGAGAGAAGCTAAACGTGTTATTTT 1050
siRNA#2=CCACTAAACTGCGAGAGAA
(Dox)SMARTchoice=CGAGAGAAGCTAAACGTGTTATTTT

CCCTTAAATTTTTTTGTAATGGTAGCTTTTTTCTACATCTTACTCCTGTTGATGCAGCTAAGGTACATTT 1120
GTAAAAAGAAAAAAACCAGACTTTTTCAGACAAACCCTTTGTATTGTAGATAAGAGGAAAAGACTGAGCA 1190
TGCTCACTTTTTTATATTAATTTTTACAGTATTTGTAAGAATAAAGCAGCATTTGAAATCGAAAAAAA 1260

```

**Supplemental Figure S6. *CEBPD* targeting sequences.** The human *CEBPD* sequence (NM\_005195.3) is shown along with the aligned sequences of each siRNA and shRNA (pDEST\_SIGMA) used in this study. The translation start and stop codons are indicated by shaded boxes.
